# Supplementary material
Source: publisher figshare collection journal article supplement (https://sage.figshare.com/ndownloader/files/19146245)
Supplement: Supplementary file 1 [file 19146245]

## Supplemental Material

*Table S1.* The residual variance and standardized estimates for the association between the exogenous covariates and the latent factors at T2 and T3.

| Exogenous covariate       | PTSD-RI T2 | PTSD-RI T3 | CES T2  | CES T3  |
|---------------------------|------------|------------|---------|---------|
| Age                       | .039       | -.024      | -.035   | .022    |
| Gender <sup>a</sup>       | -.259***   | -.089      | -.125   | .047    |
| Ethnicity <sup>b</sup>    | .270***    | .043       | .083    | -.020   |
| Exposure                  | .197***    | -.042      | .115    | .005    |
| New traumatic experiences | .161**     | .033       | .060*   | .007    |
| Residual variance         | .781***    | .304***    | .930*** | .375*** |

*NOTE:* CES = Centrality of Event Scale, PTSD-RI = Posttraumatic Stress Disorder Reaction Index.

Gender<sup>a</sup> : 0 = female, 1 = male, Ethnicity<sup>b</sup> : 0 = Norwegian origin, 1 = non-Norwegian origin

\*p < .05

\*\*p < .01

\*\*\*p < .001

*Table S2.* The standardized factor loadings and residual correlation for the PTSD-RI items and the five subfactors at T2 and T3.

| <b>Subfactor</b>                          | <b>PTSD-RI<br/>T2</b> | <b>PTSD-RI T3</b> | <b>Correlation</b> |
|-------------------------------------------|-----------------------|-------------------|--------------------|
| Intrusion/re-experiencing                 | .966                  | .961              | 1.061              |
| Intr2 (psychological cue reactivity)      | .750                  | .803              | .219               |
| Intr3 (physiological cue reactivity)      | .825                  | .884              | .316               |
| Intr5 (recurrent dreams of trauma)        | .661                  | .708              | .405               |
| Intr6 (intrusive recollection)            | .771                  | .826              | .354               |
| Intr18 (flashbacks)                       | .780                  | .836              | .168               |
| Numbing                                   | .743                  | .855              | .406               |
| Numb7 (diminished interest in activities) | .624                  | .677              | .303               |
| Numb8 (detachment from others)            | .783                  | .844              | .403               |
| Numb15 (memory impairment)                | .366                  | .400              | .433               |
| NumbC6 (restricted range of affect)       | .665                  | .721              | .523               |
| NumbC7 (sense of foreshortened future)    | .765                  | .826              | .547               |
| Dysphoric arousal                         | .929                  | .903              | .161               |
| Dysp13 (sleeping difficulties)            | .591                  | .682              | .354               |
| Dysp16 (difficulty concentrating)         | .670                  | .772              | .518               |
| DyspD2 (irritability or anger)            | .641                  | .739              | .348               |
| Anxious arousal                           | .855                  | .865              | .775               |
| Anx1 (hypervigilance)                     | .824                  | .839              | .306               |
| Anx12 (exaggerated startle response)      | .791                  | .805              | .493               |
| Avoidance                                 | .793                  | .788              | .889               |
| Avoi9 (avoidance of thoughts of trauma)   | .486                  | .518              | .462               |
| Avoi17 (avoidance of reminders)           | .875                  | .933              | -.586              |

NOTE: PTSD-RI = Posttraumatic Stress Disorder Reaction Index.

*Table S3.* The standardized factor loadings and residual correlation for CES at T2 and T3.

| <b>Item</b>               | <b>CES T2</b> | <b>CES T3</b> | <b>Correlation</b> |
|---------------------------|---------------|---------------|--------------------|
| 1 (part of identity)      | .68           | .72           | .44                |
| 2 (reference point)       | .67           | .70           | .33                |
| 3 (central to life story) | .71           | .74           | .50                |
| 4 (colored thoughts)      | .75           | .78           | .06                |
| 5 (changed life)          | .78           | .82           | .34                |
| 6 (effects on future)     | .82           | .85           | .17                |
| 7 (turning point)         | .73           | .76           | .30                |

*NOTE:* CES = Centrality of Event Scale.

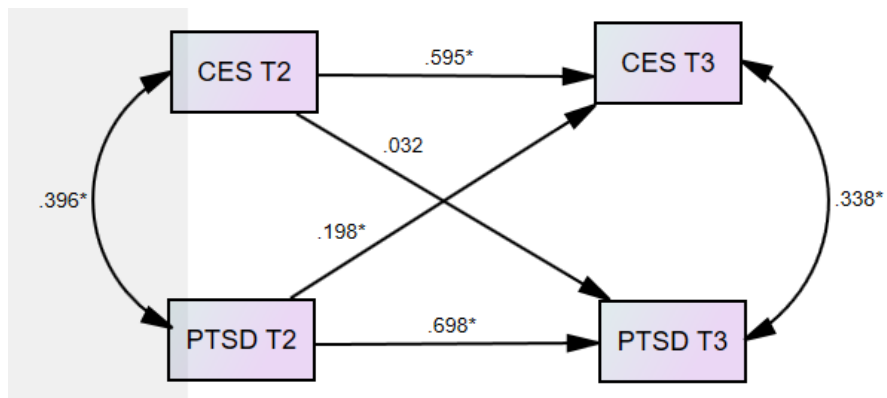

*Figure S1.* The relationship between event centrality (CES) and posttraumatic stress symptoms (PTSD-RI) at T2 and T3, with standardized estimates (N = 319).
